# Supplementary material for: Lipid Raft Integrity and Cellular Cholesterol Homeostasis Are Critical for SARS-CoV-2 Entry into Cells
Source: MDPI journal article supplement (doi:10.3390/nu14163417), 2022-08-19
Supplement: s1 [file s1]

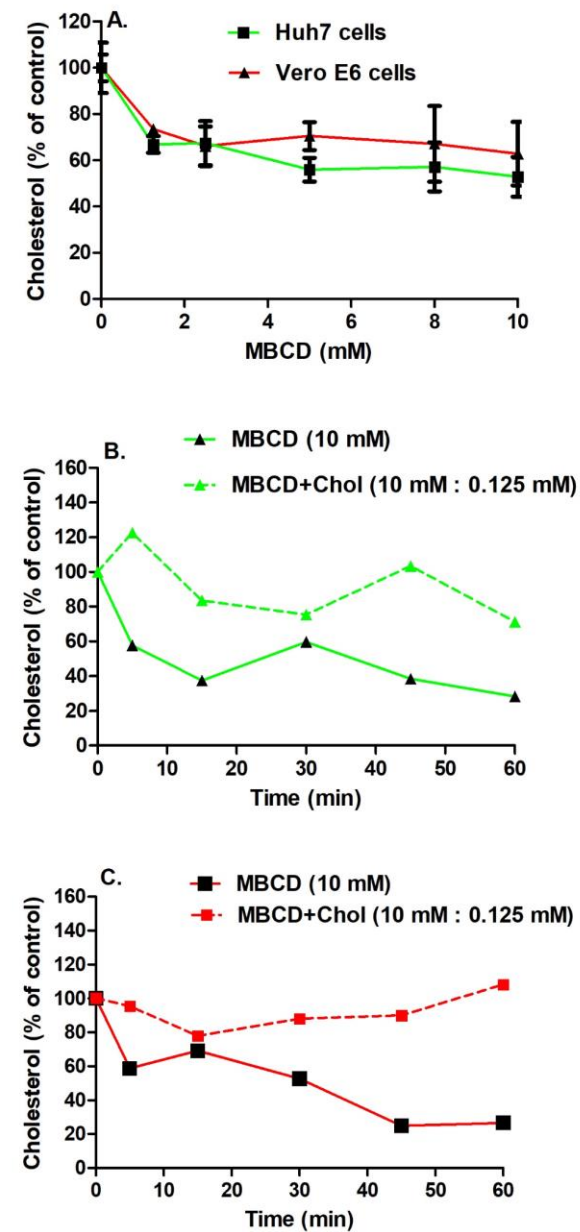

**Figure S1.** Effects of cholesterol-depleting agent MBCD on the content of intracellular cholesterol. Huh7 and Vero E6 cells were grown in DMEM containing 10% FBS until confluency, and then treated with increasing concentrations of MBCD for 1h to deplete cholesterol from cells (**Panel A**, N=3). In subsequent experiments, Huh7 (**Panel B**, N=2) and Vero E6 cells (**Panel C**, N=2) were treated with either BMCD alone (10 mM) or MBCD-cholesterol complexes (10 mM- 0.125 mM) for 5min-60 min. After the treatment, total cholesterol was extracted from the cells and measured by colorimetric cholesterol assay.

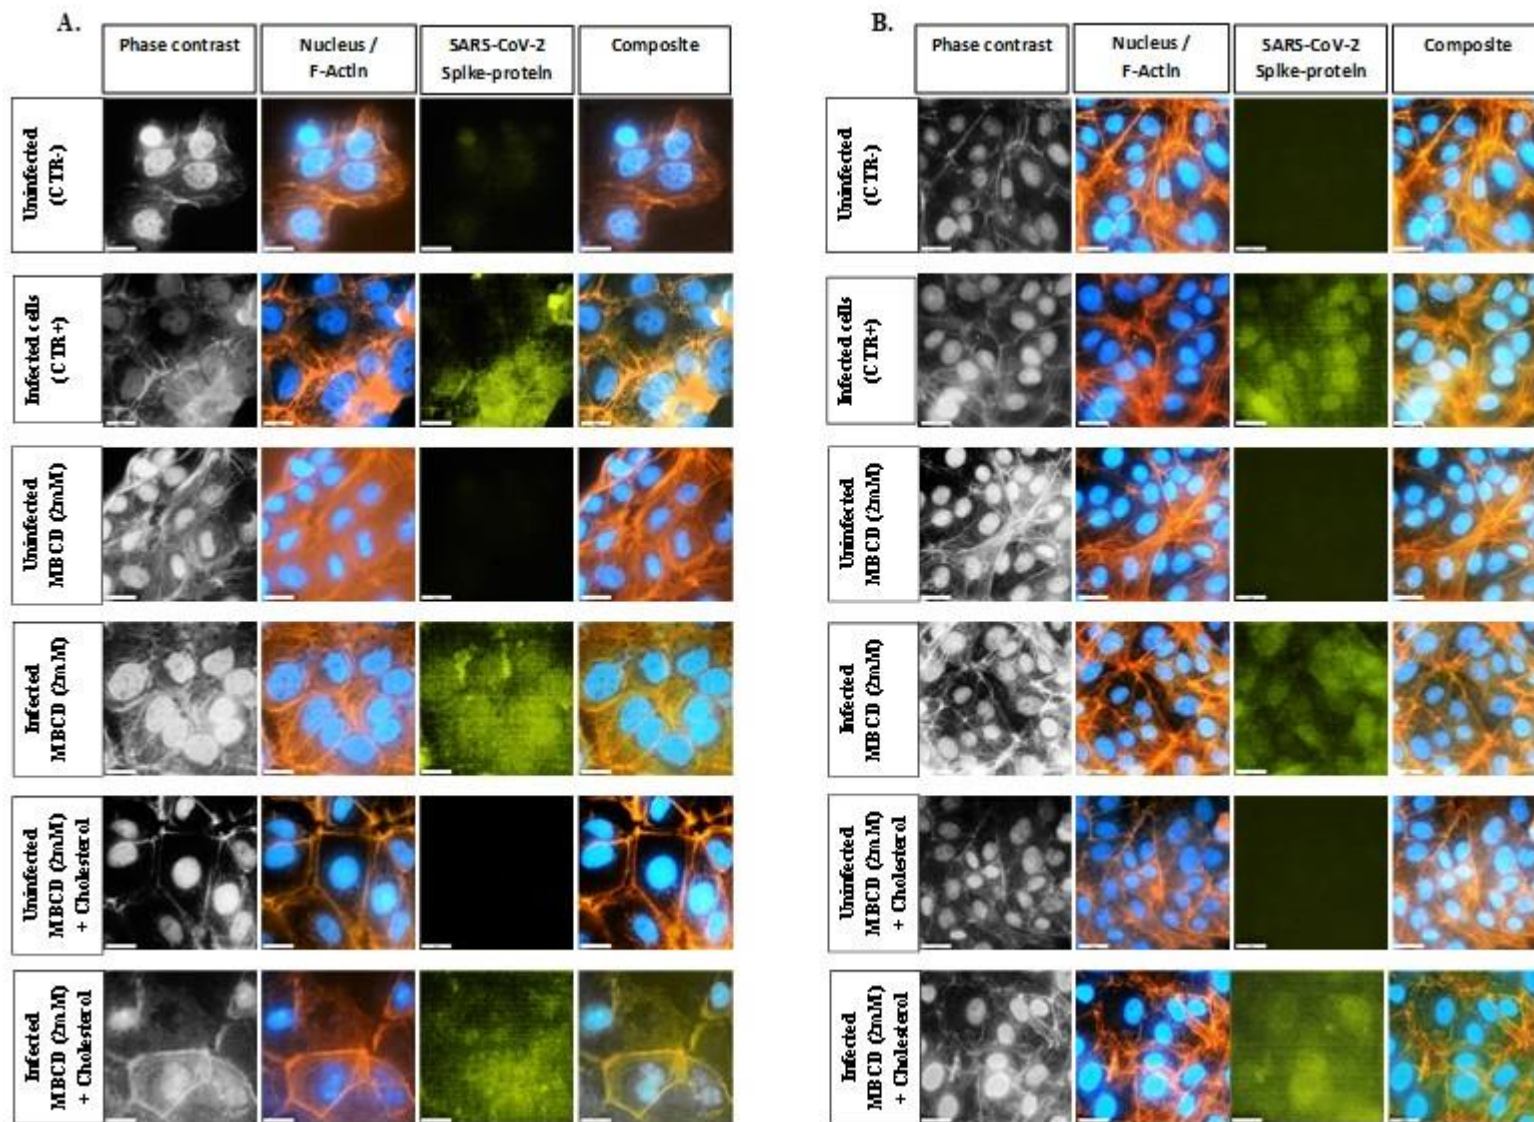

**Figure S2. M $\beta$ CD treatment did not disturb the cell morphology in wild-type SARS-CoV-2 infected cells.** Huh7 and Vero E6 cells were treated with M $\beta$ CD (2mM) or MB $\beta$ CD + cholesterol for 1h prior infection with wild-type SARS-CoV-2pp (MOI=0.1). At 48h p.i., Huh7 (**Panel A**) and Vero E6 cells (**Panel B**) were fixed and analyzed by immunofluorescence staining using DAPI for cell nuclei (blue), anti-actin antibody (orange), SARS-CoV-2 anti-spike proteins (green) and merged double stained (composite). M $\beta$ CD-treated cells were compared to controls: untreated-uninfected (CTR-) and untreated-infected (CTR+) cells. Images were taken and analyzed with resolution of fluorescence microscopy up to 20 $\mu$ m.

**Table S1.** Primers and probes used to detect SARS-CoV-2

| Gene             | Primer/Probe                                                     | Sequence (5'–3')                                                                                                               |
|------------------|------------------------------------------------------------------|--------------------------------------------------------------------------------------------------------------------------------|
| <b>RdRp-gene</b> | RdRP_SARSr-F2<br>RdRP_SARSr-R1<br>RdRP_SARSr-P2<br>RdRP_SARSr-P1 | GTGARATGGTCATGTGTGGCGG<br>CARATGTTAAASACACTATTAGCATA<br>FAM CAGGTGGAACCTCATCAGGAGATGC-BBQ<br>FAM-CCAGGTGWACRTCATCMGGTGATGC-BBQ |
| <b>E-gene</b>    | E_Sarbeco_F1<br>E_Sarbeco_R2<br>E_Sarbeco_P1                     | ACAGGTACGTTAATAGTTAATAGCGT<br>ATATTGCAGCAGTACGCACACA<br>FAM-ACACTAGCCATCCTTACTGCGCTTCG-BBQ                                     |
| <b>N-gene</b>    | N_Sarbeco_F1<br>N_Sarbeco_R1<br>N_Sarbeco_P1                     | CACATTGGCACCCGCAATC<br>GAGGAACGAGAAGAGGCTTG<br>FAM-ACTTCCTCAAGGAACAACATTGCCA-BBQ                                               |

R, A/G; W, A/T; FAM, 6-fluorescein amidite; BBQ, blackberry quencher

**Table S2.** List of primers used for qRT-PCR

| Target Gene<br>(Human) | Primer Sequences (5'-3')                                  |
|------------------------|-----------------------------------------------------------|
| CH25H                  | F: CTTTCCGTGGAGGACCACTC<br>R: GTGAGAGTGATGCAGGTCGT        |
| SREBF1                 | F: CAGCAGCTACTGACAGTCACA<br>R: CTTGATGAAGTGGGGCTGC        |
| SCAP                   | F: TGCACTGAACCTGGACTTGG<br>R: CCCAAAGTGCCTGACAGATG        |
| LDLR                   | F: CGTGCTCCTCGTCTTCCTTT<br>R: TCTGTCTCGAGGGGTAGCTG        |
| ACAT1                  | F: GTTCTGGTCCAAAAACCGCC<br>R: CGCCGAGACCTTGAAGTAG         |
| HMGCR                  | F: CTCTTATTGGTCGAAGGCTCG<br>R: CCACAAAGAGGCCATGCATTC      |
| HMGCS1                 | F: GGGCGTTGAGGTCTAGGTATTCT<br>R: TTTCCTCCTTCGGGCACTCTA    |
| APOA1                  | F: CTGTTTGCCCACTCTATTTGCC<br>R: CCTGTTGCTGCTCACTGGTC      |
| APOB                   | F: ACTGCTAAAGGCATGGCACT<br>R: TGCCGTGATCTCAAATGGCT        |
| SREBP2                 | F: TCTGGAGACCATGGAGACCC<br>R: GTCAGGGAACTCTCCCACTTG       |
| NPC1L1                 | F: TGAGCTGCATGGCTGACTAC<br>R: AGGGCCTCTGCCTCAGAATA        |
| PPARA                  | F: GCGAACGATTCGACTCAAGC<br>R: CCAGGACGATCGTTGTGTGA        |
| PPARG                  | F: CCAGAAGCCTGCATTTCTGC<br>R: CACGGAGCTGATCCCCAAAGT       |
| PPARD                  | F: CCGGGACAGTGTGTACAGT<br>R: AGGTCTCGTTGGTGCATCTG         |
| FDFT1                  | F: GCATGAGCGACTTTTGCGTG<br>R: GCCTGGATAACAGCTGCGAA        |
| NR1H2                  | F: TGTCTCTCCTACCACGAGT<br>R: TTCAGAAAGGACGCCCCAGT         |
| NR1H3                  | F: AGCCAAGGTACAGGTAACGA<br>R: GGTTCCAGCTTGTTTGCTGC        |
| MBTPS1                 | F: GGACCAAGTGTGCTTCTCCA<br>R: CTGCTTCATACTGGCGGGAT        |
| MBTPS2                 | F: TGTCGTCTACCTGACCGACT<br>R: TCCGTGTGTTTCCAGCCAGT        |
| ACAT2                  | F: GACTTCGTCTCCTTCGTGCC<br>R: CCCCAAATCCGAAGGACTGG        |
| ACE2                   | F: GGGATCAGAGATCGGAAGAAGAAA<br>R: AGGAGGTCTGAACATCATCAGTG |
| ABCA1                  | F: GGGTGGTGTCTTCCTCATTACTG<br>R: CCGCCTCACATCTTCATCTTCATC |
| ACTIN                  | F: ATCGTGCGTGACATTAAGGAGAAG<br>R: AGGAAGGAAGGCTGGAAGAGTG  |

F, forward; R, reverse
